# Supplementary material for: A Low-Cost Wireless Bite Force Measurement Device
Source: MDPI journal article supplement (doi:10.3390/ma15114000), 2022-06-04
Supplement: s1 [file s1]

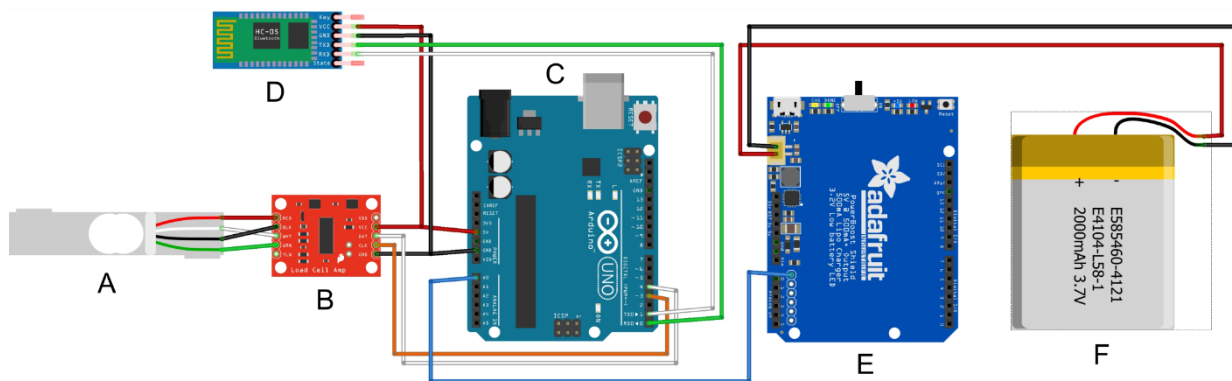

**Figure S1.** Read-out components and circuitry scheme. (A) and (B) show respectively a generic load cell and the connected signal amplifier HX711. (C) shows the Arduino UNO board connected to the Bluetooth module HC-05 (D), the battery charger shield (E) and the battery (F).
